# Supplementary material for: The Effect of Disability on the Diagnosis and Treatment of Multiple Myeloma in Korea: A National Cohort Study
Source: PubMed Central journal article supplement — Cancer Res Treat. 2019 Apr 22;52(1):1–9. doi: 10.4143/crt.2018.702 (PMC6962464; doi:10.4143/crt.2018.702), 2019-04-22
Supplement: crt-2018-702-suppl1.pdf [file crt-2018-702-suppl1.pdf]

**S1 Table.** Categorization of type of disabilities

| Category                      | Type of disability                                                                                                   |
|-------------------------------|----------------------------------------------------------------------------------------------------------------------|
| Physical                      | Amputation, motor disturbance, joint disability, disfigurements or deformities, spinal cord injury, brain impairment |
| Communication                 | Sight, hearing or speech problems                                                                                    |
| Intellectual or psychological | Difficulty learning or understanding things, mental illness                                                          |
| Major internal organ          | Functional impairment of internal organ diseases such as kidney, heart, liver, lung, intestine                       |
