# Supplementary material for: The Effect of Disability on the Diagnosis and Treatment of Multiple Myeloma in Korea: A National Cohort Study
Source: PubMed Central journal article supplement — Cancer Res Treat. 2019 Apr 22;52(1):1–9. doi: 10.4143/crt.2018.702 (PMC6962464; doi:10.4143/crt.2018.702), 2019-04-22
Supplement: crt-2018-702-suppl2.pdf [file crt-2018-702-suppl2.pdf]

**S2 Table.** Basic characteristics of people in entire cohort

|                               | All cohort       | People without disabilities | People with disabilities |
|-------------------------------|------------------|-----------------------------|--------------------------|
|                               | 11,115,800(100)  | 8,329,350 (100)             | 2,776,450 (100)          |
| Age (yr)                      |                  |                             |                          |
| < 65                          | 7,170,394 (64.5) | 5,322,371 (63.9)            | 1,848,023 (66.6)         |
| ≥ 65                          | 3,640,063 (32.7) | 2,719,784 (32.7)            | 920,279 (33.1)           |
| Sex                           |                  |                             |                          |
| Male                          | 6,498,991 (58.5) | 4,874,242 (58.5)            | 1,624,749 (58.5)         |
| Female                        | 4,606,809 (41.4) | 3,455,108 (41.5)            | 1,151,701 (41.5)         |
| Income                        |                  |                             |                          |
| Below poverty line (lowest)   | 791,356 (7.1)    | 323,466 (3.9)               | 467,890 (16.9)           |
| I                             | 1,985,606 (17.9) | 1,471,840 (17.7)            | 513,766 (18.5)           |
| II                            | 1,923,186 (17.3) | 1,459,623 (17.5)            | 463,563 (16.7)           |
| III                           | 2,505,234 (22.5) | 1,929,692 (23.2)            | 575,542 (20.7)           |
| IV (highest)                  | 3,605,075 (32.4) | 2,857,534 (34.3)            | 747,541 (26.9)           |
| Severity of disability        |                  |                             |                          |
| Severe                        | -                | -                           | 1,091,794 (39.3)         |
| Mild                          | -                | -                           | 1,684,656 (60.7)         |
| Type of disability            |                  |                             |                          |
| Physical                      | -                | -                           | 1,728,916 (62.3)         |
| Communication                 | -                | -                           | 588,712 (21.2)           |
| Intellectual or psychological | -                | -                           | 307,720 (11.1)           |
| Major internal organs         | -                | -                           | 151,102 (5.44)           |

Values are presented as number (%).
