# Supplementary material for: The Effect of Disability on the Diagnosis and Treatment of Multiple Myeloma in Korea: A National Cohort Study
Source: PubMed Central journal article supplement — Cancer Res Treat. 2019 Apr 22;52(1):1–9. doi: 10.4143/crt.2018.702 (PMC6962464; doi:10.4143/crt.2018.702), 2019-04-22
Supplement: crt-2018-702-suppl3.pdf [file crt-2018-702-suppl3.pdf]

**S3 Table.** Basic characteristics of people in cohort of disability in study cohort

|                                | Severity of disability  |                       |                           | Type of disability           |                                                 |                                         |
|--------------------------------|-------------------------|-----------------------|---------------------------|------------------------------|-------------------------------------------------|-----------------------------------------|
|                                | Severe<br>(n=1,091,794) | Mild<br>(n=1,684,656) | Physical<br>(n=1,728,916) | Communication<br>(n=588,712) | Intellectual or<br>psychological<br>(n=307,720) | Major internal<br>organs<br>(n=151,102) |
| Age (yr)                       |                         |                       |                           |                              |                                                 |                                         |
| < 65                           | 785,173 (71.9)          | 1,071,018 (63.6)      | 1,126,472 (65.2)          | 322,506 (54.8)               | 295,482 (96.0)                                  | 106,278 (70.3)                          |
| ≥ 65                           | 306,621 (28.1)          | 613,638 (36.4)        | 597,370 (34.6)            | 264,479 (44.9)               | 11,332 (3.7)                                    | 44,383 (29.4)                           |
| Sex                            |                         |                       |                           |                              |                                                 |                                         |
| Male                           | 653,958 (59.9)          | 970,790 (57.6)        | 1,006,246 (58.2)          | 341,035 (57.9)               | 182,473 (59.3)                                  | 95,216 (63.0)                           |
| Female                         | 437,836 (40.1)          | 713,866 (42.4)        | 722,699 (41.8)            | 244,936 (41.6)               | 125,239 (40.7)                                  | 58,606 (38.8)                           |
| Income                         |                         |                       |                           |                              |                                                 |                                         |
| Below poverty line<br>(lowest) | 306,704 (28.1)          | 161,187 (9.6)         | 223,034 (12.9)            | 75,590 (12.8)                | 140,933 (45.8)                                  | 27,995 (18.5)                           |
| I                              | 177,224 (16.2)          | 344,708 (20.5)        | 337,144 (19.5)            | 115,436 (19.6)               | 43,387 (14.1)                                   | 26,765 (17.7)                           |
| II                             | 157,095 (14.4)          | 306,468 (18.2)        | 302,565 (17.5)            | 101,373 (17.2)               | 35,079 (11.4)                                   | 24,612 (16.3)                           |
| III                            | 197,495 (18.1)          | 378,033 (22.4)        | 378,640 (21.9)            | 124,226 (21.1)               | 40,618 (13.2)                                   | 31,534 (20.9)                           |
| IV (highest)                   | 253,275 (23.2)          | 494,259 (29.3)        | 487,562 (28.2)            | 169,346 (28.8)               | 47,695 (15.5)                                   | 42,916 (28.4)                           |

Values are presented as number (%).
