# Supplementary material for: The Effect of Disability on the Diagnosis and Treatment of Multiple Myeloma in Korea: A National Cohort Study
Source: PubMed Central journal article supplement — Cancer Res Treat. 2019 Apr 22;52(1):1–9. doi: 10.4143/crt.2018.702 (PMC6962464; doi:10.4143/crt.2018.702), 2019-04-22
Supplement: crt-2018-702-suppl4.pdf [file crt-2018-702-suppl4.pdf]

**S4 Table.** Use of novel agents for MM patients according to age and presence, severity, and type of disabilities

|                               | Patients < 65 yr |             | Patients ≥ 65 yr |             |
|-------------------------------|------------------|-------------|------------------|-------------|
|                               | Bortezomib       | Thalidomide | Bortezomib       | Thalidomide |
| All patients                  | 649 (50.7)       | 610 (47.6)  | 1,497 (53.3)     | 517 (18.4)  |
| Patients without disability   | 520 (50.7)       | 489 (47.7)  | 1,214 (53.8)     | 426 (18.9)  |
| Patients with disability      | 129 (50.4)       | 121 (47.3)  | 283 (51.2)       | 91 (16.5)   |
| Severity of disability        |                  |             |                  |             |
| Severe (grade 1, 2, 3)        | 48 (44.9)        | 45 (42.1)   | 77 (51.0)        | 23 (15.2)   |
| Mild (grade 4, 5, 6)          | 81 (54.4)        | 76 (51.0)   | 206 (51.2)       | 68 (16.9)   |
| Type of disability            |                  |             |                  |             |
| Physical                      | 83 (50.6)        | 81 (49.4)   | 187 (54.7)       | 60 (17.5)   |
| Communication                 | 25 (67.6)        | 21 (56.8)   | 81 (47.4)        | 26 (15.2)   |
| Intellectual or psychological | 4 (22.2)         | 8 (44.4)    | 0 (0.0)          | 0 (0.0)     |
| Major internal organ          | 17 (45.9)        | 11 (29.7)   | 15 (42.9)        | 5 (14.3)    |

Values are presented as number (%). MM, multiple myeloma.
